# Supplementary material
Source: PubMed Central journal article supplement (PMC2789673)
Supplement: 90350.2008_7.pdf [file 90350.2008_7.pdf]

**Table S1: Summary of ANOVA models in Strain Survey Database**

| <b>Model</b>         | <b>Tested Term</b> | <b>Data Set<sup>a</sup></b> | <b>Tests<sup>b</sup></b> | <b>Resulting Transcriptional Differences<sup>c</sup></b> |
|----------------------|--------------------|-----------------------------|--------------------------|----------------------------------------------------------|
| Overall <sup>d</sup> | GROUP              | All data                    | 1                        | Differences between any conditions                       |
| Model 1 <sup>e</sup> | STRAIN             | All data                    | 1                        | Strain differences [sex, diet]                           |
|                      |                    | F                           | 1                        | Strain differences in females [diet]                     |
|                      |                    | M                           | 1                        | Strain differences in M [diet]                           |
|                      |                    | LF                          | 1                        | Strain differences when fed LF diet [sex]                |
|                      |                    | HF                          | 1                        | Strain differences when fed HF diet [sex]                |
|                      |                    | F, LF                       | 1                        | Strain differences in F fed LF diet                      |
|                      |                    | F, HF                       | 1                        | Strain differences in F fed HF diet                      |
|                      |                    | M, LF                       | 1                        | Strain differences in M fed LF diet                      |
|                      |                    | M, HF                       | 1                        | Strain differences in M fed HF diet                      |
|                      |                    | strain pairs, All data      | 66                       | Differences between 2 strains [sex, diet]                |
|                      |                    | F, LF, strain pairs         | 66                       | Differences between 2 F strains fed LF diet              |
|                      |                    | F, HF, strain pairs         | 66                       | Differences between two F strains fed HF diet            |
|                      |                    | F, HF, strain pairs         | 66                       | diet                                                     |

|                      |     |                     |    |                                           |
|----------------------|-----|---------------------|----|-------------------------------------------|
|                      |     | M, LF, strain pairs | 66 | Differences between two M strains fed LF  |
|                      |     | M, HF, strain pairs |    | diet                                      |
| SEX                  |     |                     | 1  | Differences between two M strains fed HF  |
|                      |     | All data            | 12 | diet                                      |
|                      |     | LF, strain          | 12 |                                           |
|                      |     | HF, strain          |    | Sex differences [strain, diet]            |
| DIET                 |     |                     | 1  | Sex differences in one strain when fed LF |
|                      |     | All data            | 12 | diet                                      |
|                      |     | F, strain           | 12 | Sex differences in one strain when fed HF |
|                      |     | M, strain           |    | diet                                      |
|                      |     |                     |    | Diet differences [sex, strain]            |
|                      |     |                     |    | Diet differences in F of one strain       |
|                      |     |                     |    | Diet differences in M of one strain       |
| Model 2 <sup>f</sup> | SEX | All data            | 1  | General sex differences [diet, ~strain]   |
|                      |     | LF                  | 1  | General sex differences when fed LF       |

|                      |                 |                 |            |                                                                                                                                         |
|----------------------|-----------------|-----------------|------------|-----------------------------------------------------------------------------------------------------------------------------------------|
|                      |                 | HF              | 1          | [~strain]<br>General sex differences when fed HF                                                                                        |
|                      | DIET            | All data        | 1          | [~strain]                                                                                                                               |
|                      |                 | F               | 1          |                                                                                                                                         |
|                      |                 | M               | 1          | General diet differences [sex, ~strain]<br>General diet differences in females [~strain]<br>General diet differences in males [~strain] |
| Model 3 <sup>g</sup> | DIET:STRAIN     | All data        | 1          | Diet-by-strain interactions [sex]                                                                                                       |
|                      |                 | F               | 1          | Diet-by-strain interactions in females                                                                                                  |
|                      |                 | M               | 1          | Diet-by-strain interactions in males                                                                                                    |
|                      |                 | F, strain pairs | 66         | Diet-by-strain interactions in F for two                                                                                                |
|                      |                 | M, strain pairs | 66         | strains<br>Diet-by-strain interactions in M for two<br>strains                                                                          |
| Model 4 <sup>h</sup> | SEX:DIET:STRAIN | All data        | 1          | Sex specific Diet-by-strain interactions                                                                                                |
| <b>Total</b>         |                 |                 | <b>532</b> |                                                                                                                                         |

<sup>a</sup>The data was subset before conducting the statistical test as indicated; <sup>b</sup>Total number of statistical tests

associated with modeling scheme; <sup>c</sup>terms in the bracket are treated as covariates in the given ANOVA model.

A “~” indicates a term treated as a random effect. F – females; M – males; LF – low fat; HF – high fat

<sup>d</sup>**Overall Model:**  $Y = \mu + \text{GROUP} + \varepsilon;$

<sup>e</sup>**Model 1:**  $Y = \mu + \text{SEX} + \text{DIET} + \text{STRAIN} + \varepsilon;$

<sup>f</sup>**Model 2:**  $Y = \mu + \text{SEX} + \text{DIET} + \sim\text{STRAIN} + \varepsilon;$

<sup>g</sup>**Model 3:**  $Y = \mu + \text{SEX} + \text{DIET} + \text{STRAIN} + \text{DIET}:\text{STRAIN} + \varepsilon;$

<sup>h</sup>**Model 4:**  $Y = \mu + \text{SEX} + \text{DIET} + \text{STRAIN} + \text{DIET}:\text{STRAIN} + \text{SEX}:\text{DIET} + \text{SEX}:\text{STRAIN} + \text{SEX}:\text{DIET}:\text{STRAIN} + \varepsilon;$
