# Supplementary material
Source: PubMed Central journal article supplement (PMC2789673)
Supplement: 90350.2008_8.pdf [file 90350.2008_8.pdf]

**Table S5: Top GO term leaves in k-means clustering**

| Cluster | GOTERM     | Description                                          | Counts | Category | p-value               |
|---------|------------|------------------------------------------------------|--------|----------|-----------------------|
| 1       | GO:0006888 | ER to Golgi vesicle-mediated transport               | 11     | 64       | $3.69 \times 10^{-8}$ |
| 1       | GO:0007030 | Golgi organization and biogenesis                    | 3      | 9        | $5.64 \times 10^{-4}$ |
| 1       | GO:0015031 | protein transport                                    | 24     | 635      | $1.46 \times 10^{-3}$ |
| 1       | GO:0000184 | mRNA catabolic process, nonsense-mediated decay      | 3      | 15       | $2.80 \times 10^{-3}$ |
| 1       | GO:0006465 | signal peptide processing                            | 2      | 5        | $3.64 \times 10^{-3}$ |
| 1       | GO:0043154 | negative regulation of caspase activity              | 2      | 7        | $7.46 \times 10^{-3}$ |
| 2       | GO:0006118 | electron transport                                   | 30     | 403      | $3.24 \times 10^{-5}$ |
| 2       | GO:0006637 | acyl-CoA metabolic process                           | 4      | 14       | $9.29 \times 10^{-4}$ |
| 2       | GO:0051657 | maintenance of organelle localization                | 2      | 2        | $1.11 \times 10^{-3}$ |
| 2       | GO:0006659 | phosphatidylserine biosynthetic process              | 2      | 2        | $1.11 \times 10^{-3}$ |
| 2       | GO:0043410 | positive regulation of MAPKKK cascade                | 3      | 7        | $1.12 \times 10^{-2}$ |
| 2       | GO:0019585 | glucuronate metabolic process                        | 2      | 3        | $3.24 \times 10^{-2}$ |
| 3       | GO:0007186 | G-protein coupled receptor protein signaling pathway | 94     | 606      | $1.32 \times 10^{-9}$ |
| 3       | GO:0006813 | potassium ion transport                              | 30     | 154      | $8.06 \times 10^{-6}$ |

|   |            |                                                                         |    |     |                       |
|---|------------|-------------------------------------------------------------------------|----|-----|-----------------------|
| 3 | GO:0042472 | inner ear morphogenesis                                                 | 12 | 40  | $6.21 \times 10^{-5}$ |
| 3 | GO:0001755 | neural crest cell migration                                             | 8  | 21  | $1.66 \times 10^{-4}$ |
| 3 | GO:0006814 | sodium ion transport                                                    | 20 | 104 | $3.02 \times 10^{-4}$ |
| 3 | GO:0042523 | positive regulation of tyrosine phosphorylation of Stat5 protein        | 3  | 3   | $5.68 \times 10^{-4}$ |
| 3 | GO:0042135 | neurotransmitter catabolic process                                      | 5  | 10  | $6.86 \times 10^{-4}$ |
| 3 | GO:0007409 | axonogenesis                                                            | 23 | 137 | $8.45 \times 10^{-4}$ |
| 4 | GO:0043123 | positive regulation of I-kappaB kinase/NF-kappaB cascade                | 23 | 46  | $2.26 \times 10^{-8}$ |
| 4 | GO:0007229 | integrin-mediated signaling pathway                                     | 30 | 79  | $4.21 \times 10^{-7}$ |
| 4 | GO:0019886 | antigen presentation, exogenous peptide antigen via MHC class II        | 11 | 16  | $1.70 \times 10^{-6}$ |
| 4 | GO:0019221 | cytokine and chemokine mediated signaling pathway                       | 19 | 42  | $2.64 \times 10^{-6}$ |
| 4 | GO:0030593 | neutrophil chemotaxis                                                   | 10 | 14  | $3.04 \times 10^{-6}$ |
| 4 | GO:0042535 | positive regulation of tumor necrosis factor-alpha biosynthetic process | 7  | 8   | $1.15 \times 10^{-5}$ |
| 4 | GO:0045087 | innate immune response                                                  | 25 | 70  | $1.35 \times 10^{-5}$ |
| 4 | GO:0007015 | actin filament organization                                             | 19 | 48  | $2.77 \times 10^{-5}$ |

GO term leaves were generated based on the induced GO graph resulting from all significant GO terms ( $p < 0.01$ ). <sup>a</sup>Number of differentially expressed genes in a GO term category (false discovery rate  $< 0.01$ ); <sup>b</sup>Total number of genes in a GO term category
