# Supplementary material
Source: PubMed Central journal article supplement (PMC2789673)
Supplement: 90350.2008_9.pdf [file 90350.2008_9.pdf]

**Table S6. Top scoring genes from ANOVA-SVD analysis**

| Symbol          | Description                                                                                     | $-\log_{10}(\text{p-value})^*$ | Eigengene <sup>†</sup> |
|-----------------|-------------------------------------------------------------------------------------------------|--------------------------------|------------------------|
| <i>Xist</i>     | inactive X specific transcripts                                                                 | 4.81                           | SEX                    |
| <i>Cyp4a12</i>  | cytochrome P450, family 4, subfamily a, polypeptide 12                                          | 4.19                           | SEX                    |
| <i>Sult2a2</i>  | RIKEN cDNA C730007P19 gene                                                                      | 3.94                           | SEX                    |
| <i>Ddx3y</i>    | DEAD (Asp-Glu-Ala-Asp) box polypeptide 3, Y-linked                                              | 3.80                           | SEX                    |
| <i>Fmo3</i>     | flavin containing monooxygenase 3                                                               | 3.68                           | SEX                    |
| <i>Sult3a1</i>  | sulfotransferase family 3A, member 1                                                            | 3.59                           | SEX                    |
| <i>Hao3</i>     | hydroxyacid oxidase (glycolate oxidase) 3                                                       | 3.51                           | SEX                    |
| <i>Cyp2b9</i>   | cytochrome P450, family 2, subfamily b, polypeptide 9                                           | 3.45                           | SEX                    |
| <i>Eif2s3y</i>  | eukaryotic translation initiation factor 2, subunit 3, structural gene Y-linked                 | 3.40                           | SEX                    |
| <i>Cyp2b13</i>  | cytochrome P450, family 2, subfamily b, polypeptide 13                                          | 3.35                           | SEX                    |
| <i>Hsd3b5</i>   | hydroxy-delta-5-steroid dehydrogenase, 3 beta- and steroid delta-isomerase 5                    | 3.26                           | SEX                    |
| <i>BC014805</i> | cDNA sequence BC014805                                                                          | 3.23                           | SEX                    |
| <i>Elovl3</i>   | elongation of very long chain fatty acids ( <i>FEN1/Elo2</i> , <i>SUR4/Elo3</i> , yeast)-like 3 | 3.19                           | SEX                    |
| <i>AI132709</i> | expressed sequence AI132709                                                                     | 3.13                           | SEX                    |

|                |                                                        |      |        |
|----------------|--------------------------------------------------------|------|--------|
| <i>Cyp3a41</i> | cytochrome P450, family 3, subfamily a, polypeptide 41 | 3.08 | SEX    |
| <i>Cyp2c39</i> | cytochrome P450, family 2, subfamily c, polypeptide 39 | 3.03 | SEX    |
| <i>H2-K1</i>   | histocompatibility 2, K1, K region                     | 3.30 | STRAIN |
| <i>Camk2b</i>  | calcium/calmodulin-dependent protein kinase II, beta   | 3.11 | STRAIN |
| <i>Zfp236</i>  | zinc finger protein 236                                | 3.05 | STRAIN |
| <i>Idi1</i>    | isopentenyl-diphosphate delta isomerase                | 3.16 | DIET   |
| <i>Sqle</i>    | squalene epoxidase                                     | 3.01 | DIET   |

\*permutation-validated Hotelling  $T^2$  p-value

†Eigengene most strongly correlated with gene expression for a given gene
