# Supplementary material
Source: PubMed Central journal article supplement (PMC2789673)
Supplement: 90350.2008_10.pdf [file 90350.2008_10.pdf]

**Table S7: Differential Expression when Treating Strain as a Fixed or a Random Effect**

| Contrast | Model 1* | Model 2 <sup>§</sup> | Intersection |
|----------|----------|----------------------|--------------|
| SEX      | 8715     | 9608                 | 8715         |
| DIET     | 13147    | 14785                | 13147        |
| SEX:DIET | 855      | 1014                 | 855          |

\* $Y = \mu + \text{SEX} + \text{DIET} + \text{STRAIN} + \text{SEX:DIET}$ , where STRAIN is treated as a fixed effect

<sup>§</sup> $Y = \mu + \text{SEX} + \text{DIET} + \sim\text{STRAIN} + \text{SEX:DIET}$ , where STRAIN is treated as a random effect

Differential expression is determined based on a false discovery threshold of 0.01.
