# Supplementary material
Source: PubMed Central journal article supplement (PMC2789673)

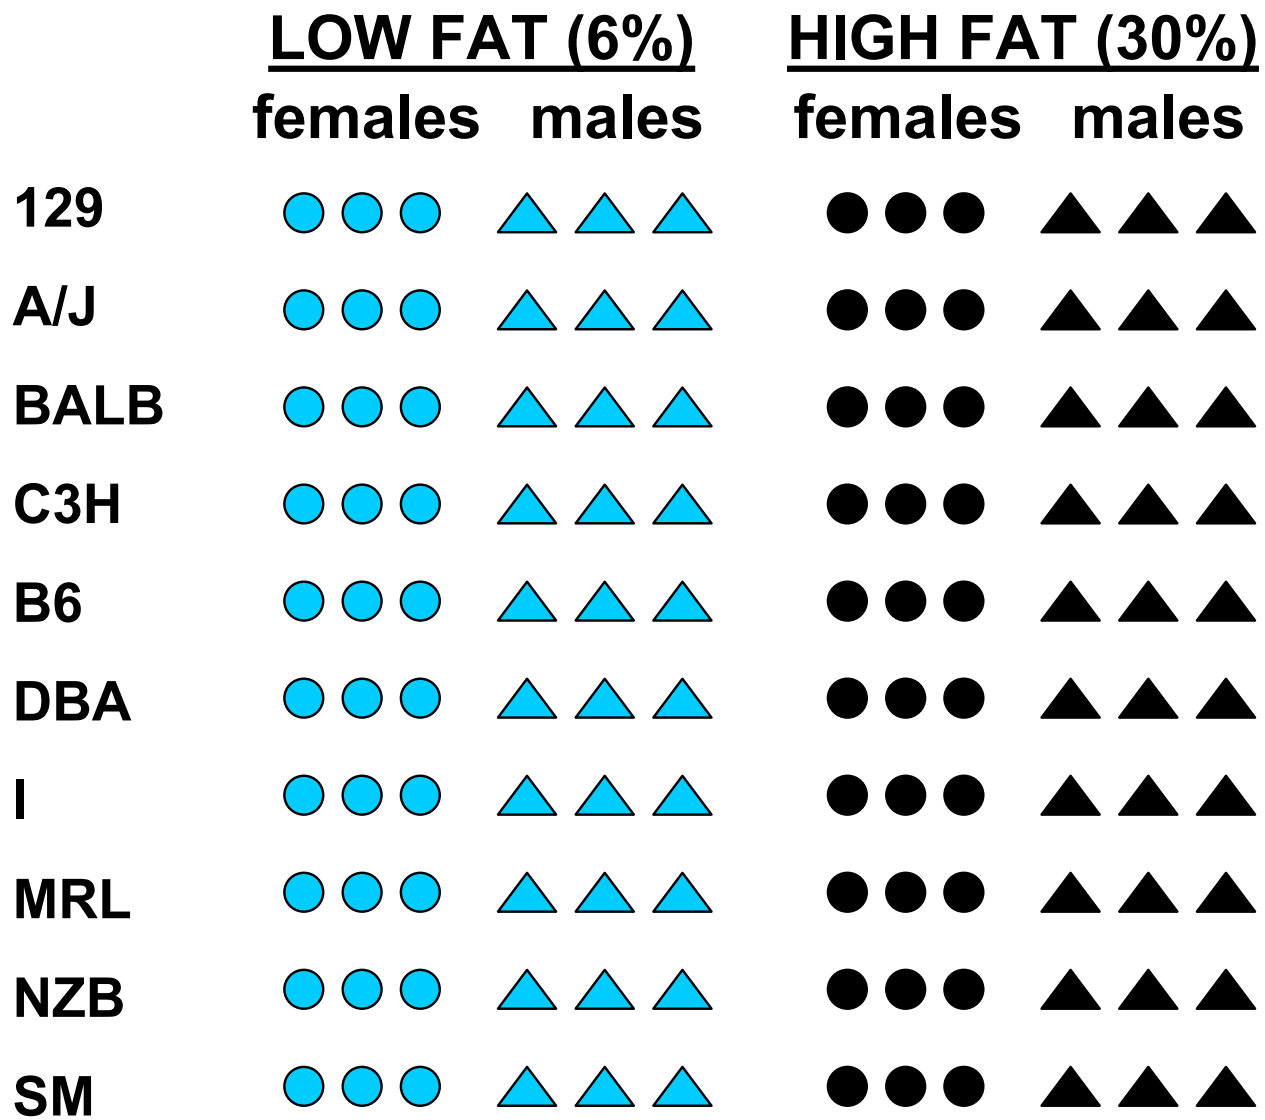

Figure S1

Supplement: 90350.2008_1.pdf [file 90350.2008_1.pdf]

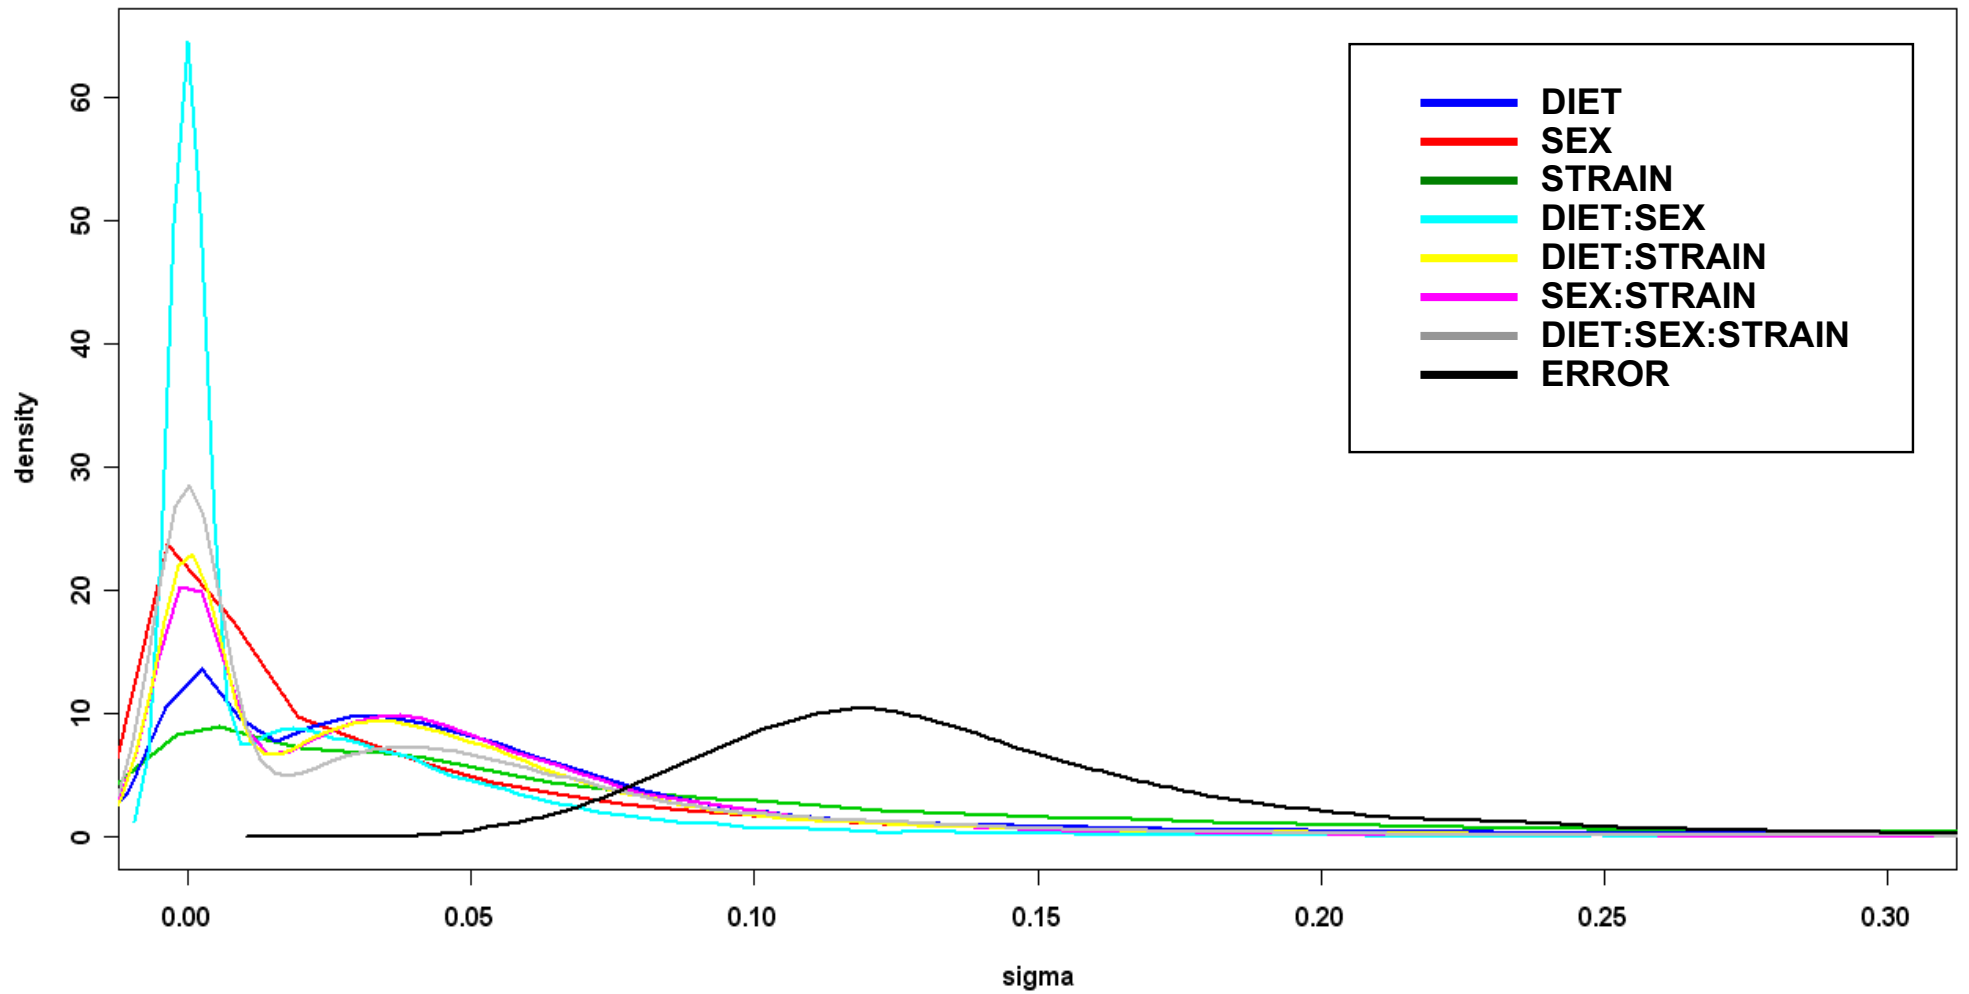

**Figure S2**

Supplement: 90350.2008_2.pdf [file 90350.2008_2.pdf]

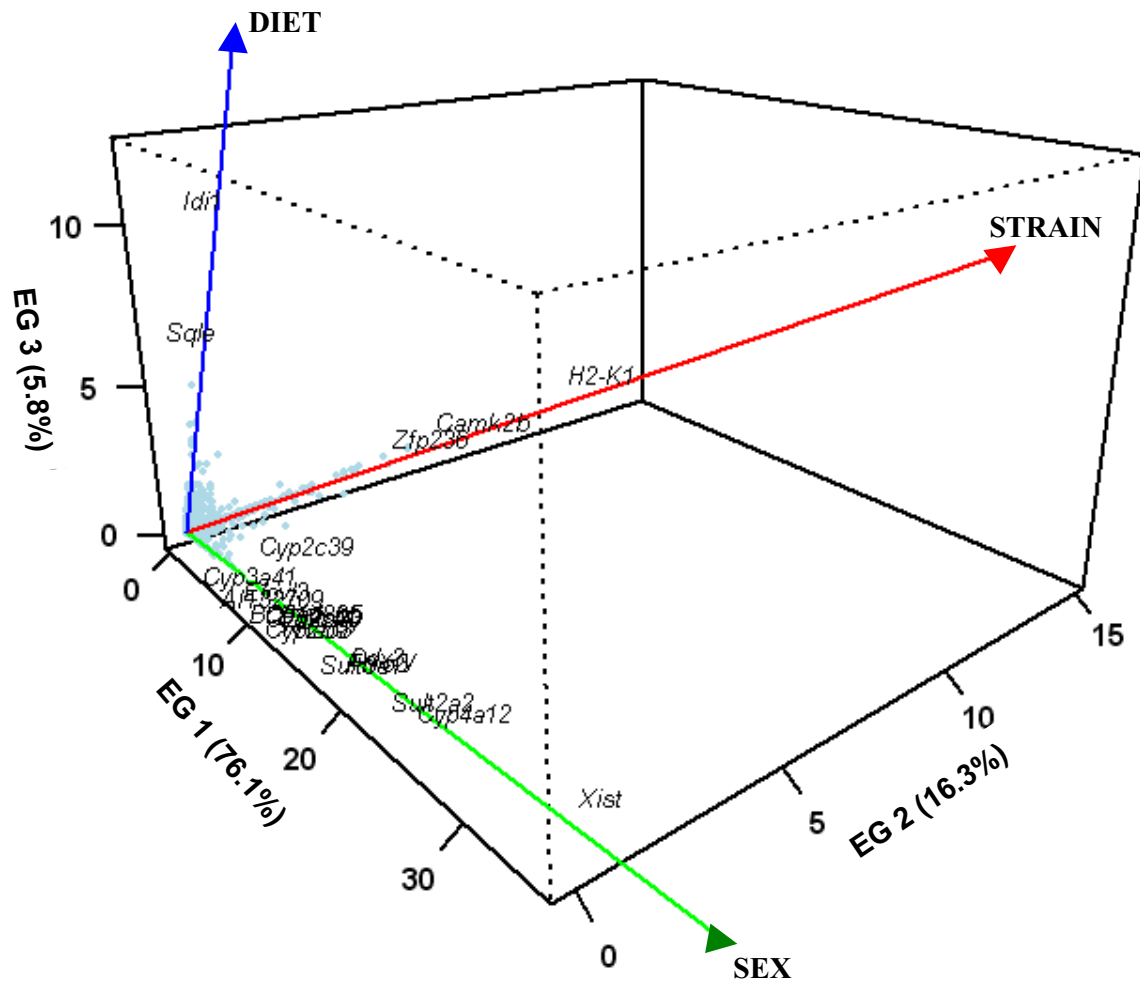

Figure S3

Supplement: 90350.2008_3.pdf [file 90350.2008_3.pdf]

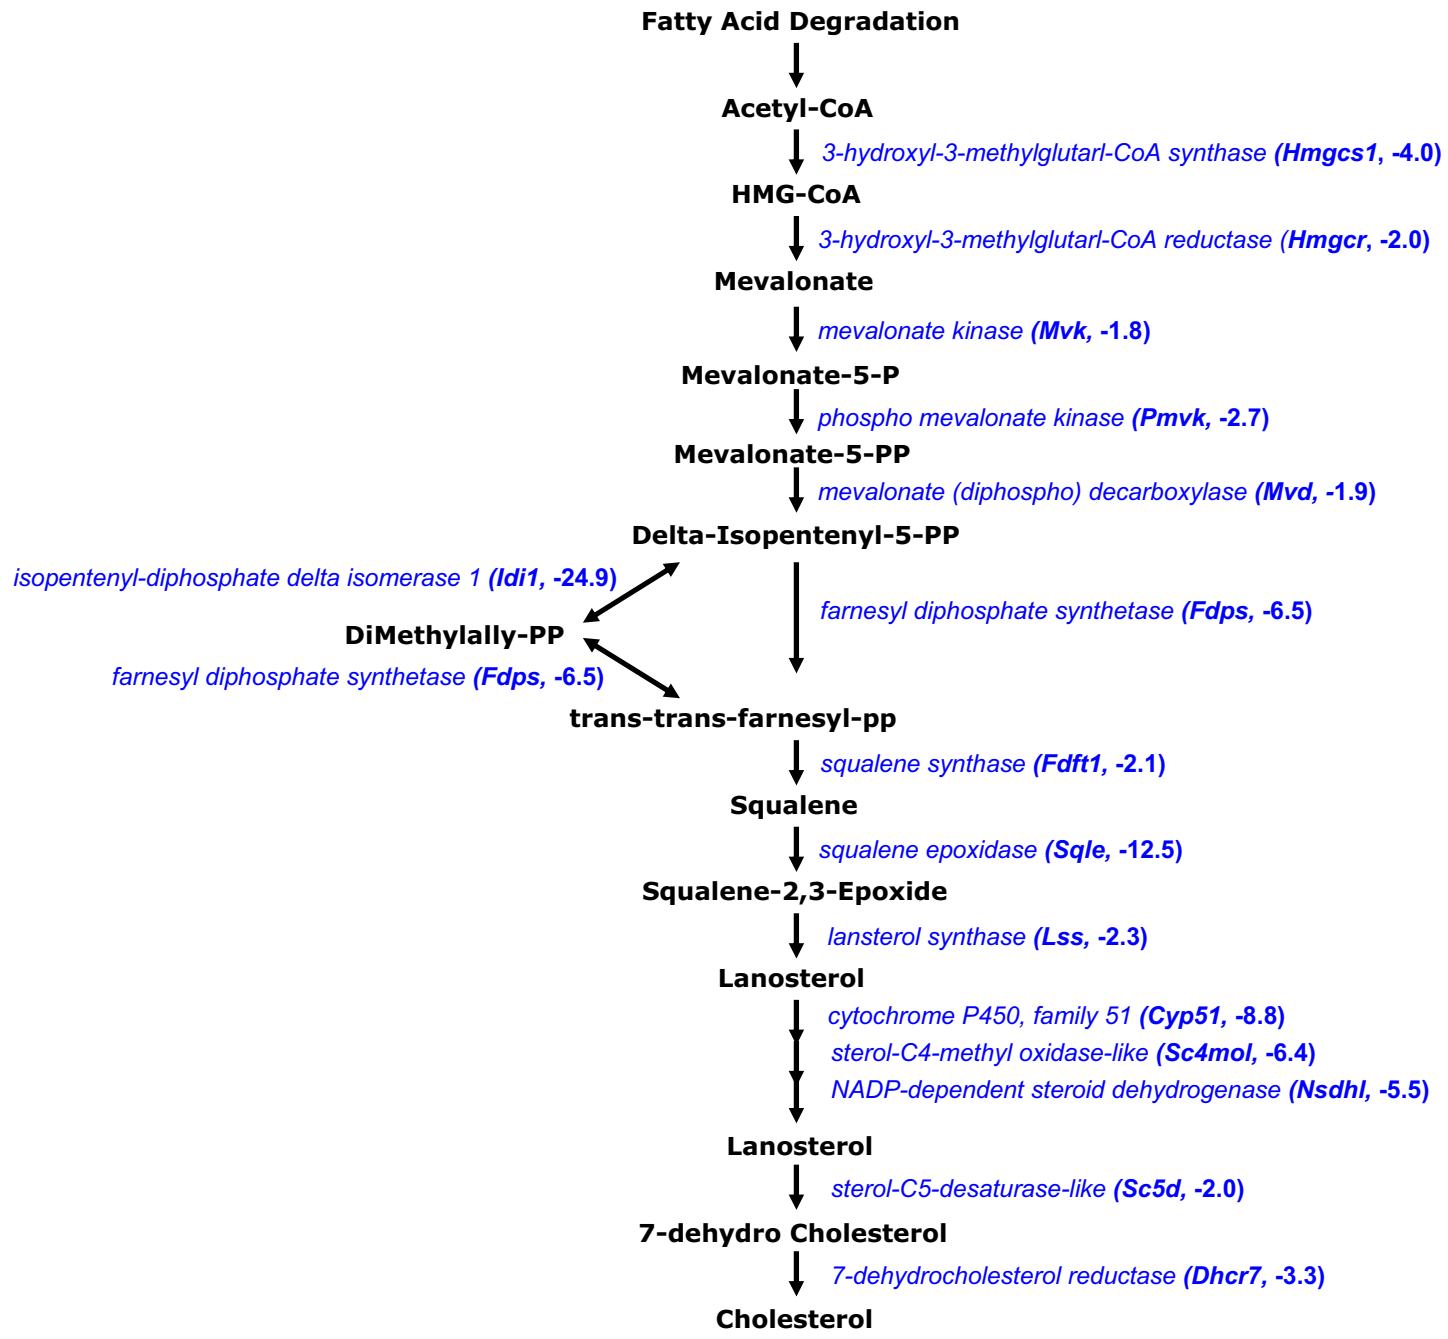

**Figure S4**

Supplement: 90350.2008_4.pdf [file 90350.2008_4.pdf]

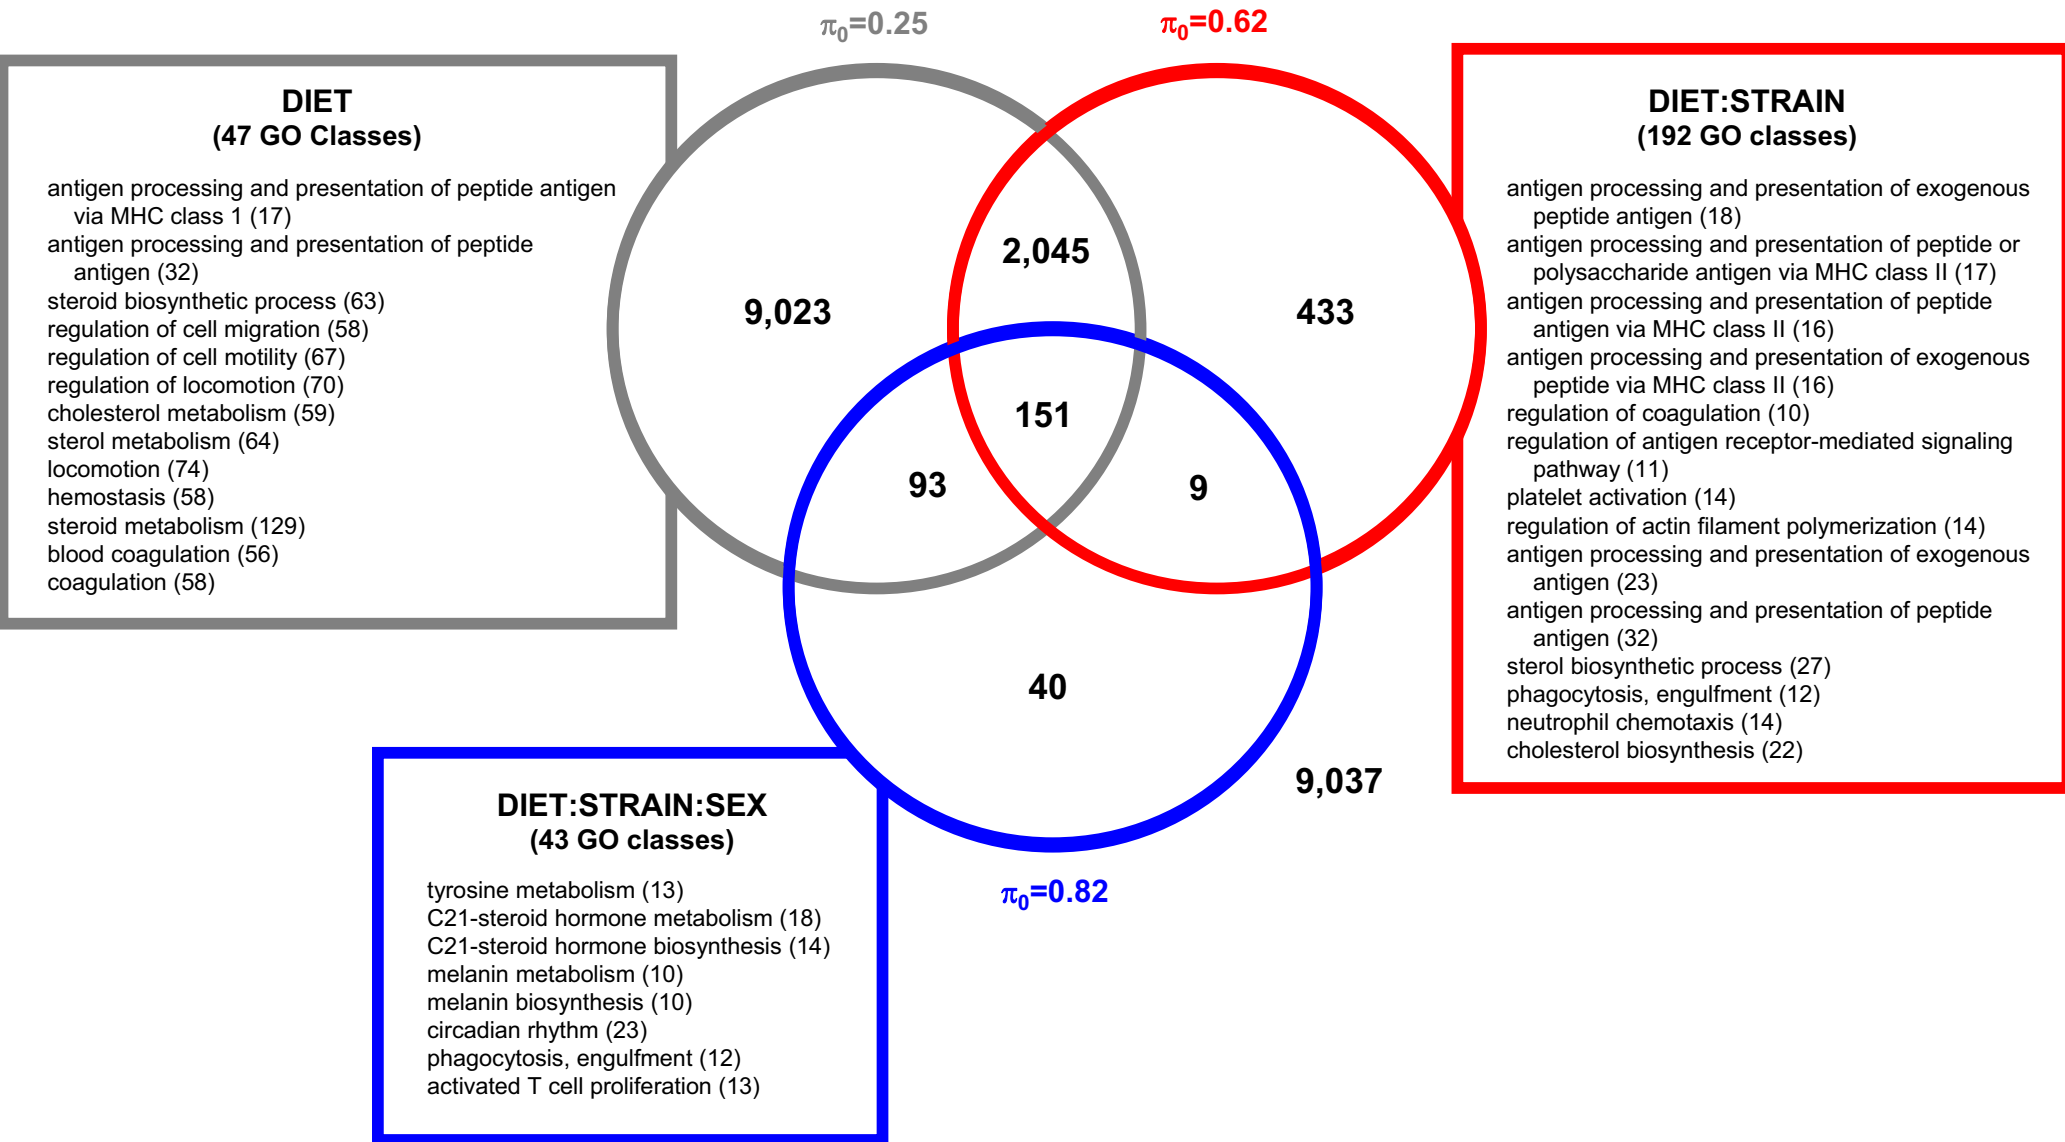

**Figure S5**

Supplement: 90350.2008_5.pdf [file 90350.2008_5.pdf]
